# Supplementary material for: Kinetic monitoring of glutathione-induced silver nanoparticle disintegration
Source: Royal Society of Chemistry journal article supplement (doi:10.1039/c8nr02369g), 2018-01-01
Supplement: c8nr02369g1.pdf [file c8nr02369g1.pdf]

**Electronic Supplementary Information**

**for**

**Kinetic monitoring of glutathione-induced silver**

**nanoparticle disintegration**

Claudia Kästner, Patrick E. J. Saloga and Andreas F. Thünemann\*

Bundesanstalt für Materialforschung und –prüfung (BAM), Unter den Eichen 87, 12205 Berlin,  
Germany

\*Author E-mail and phone: andreas.thuenemann@bam.de, +4930-8104-1610

**Table of contents**

|                    |   |
|--------------------|---|
| 1. TEM images..... | 2 |
| 2. SAXS data.....  | 3 |

## 1. TEM images

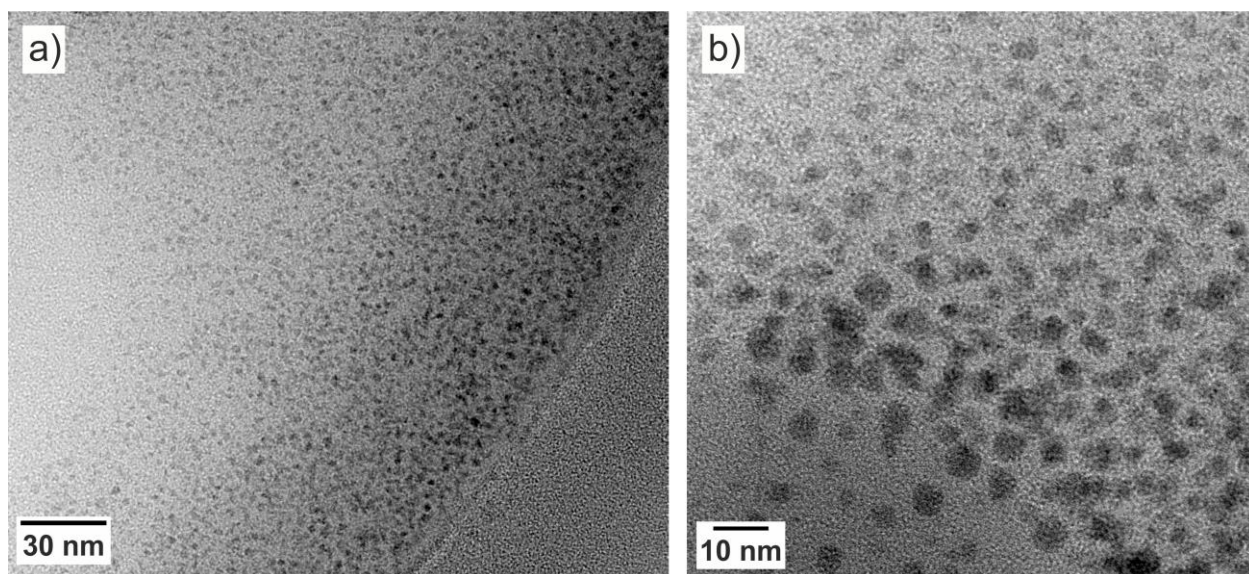

**Figure S1.** TEM pictures of the silver nanoparticles after addition of GSH. An overview is given in (a) and a detailed view in (b).

## 2. SAXS data

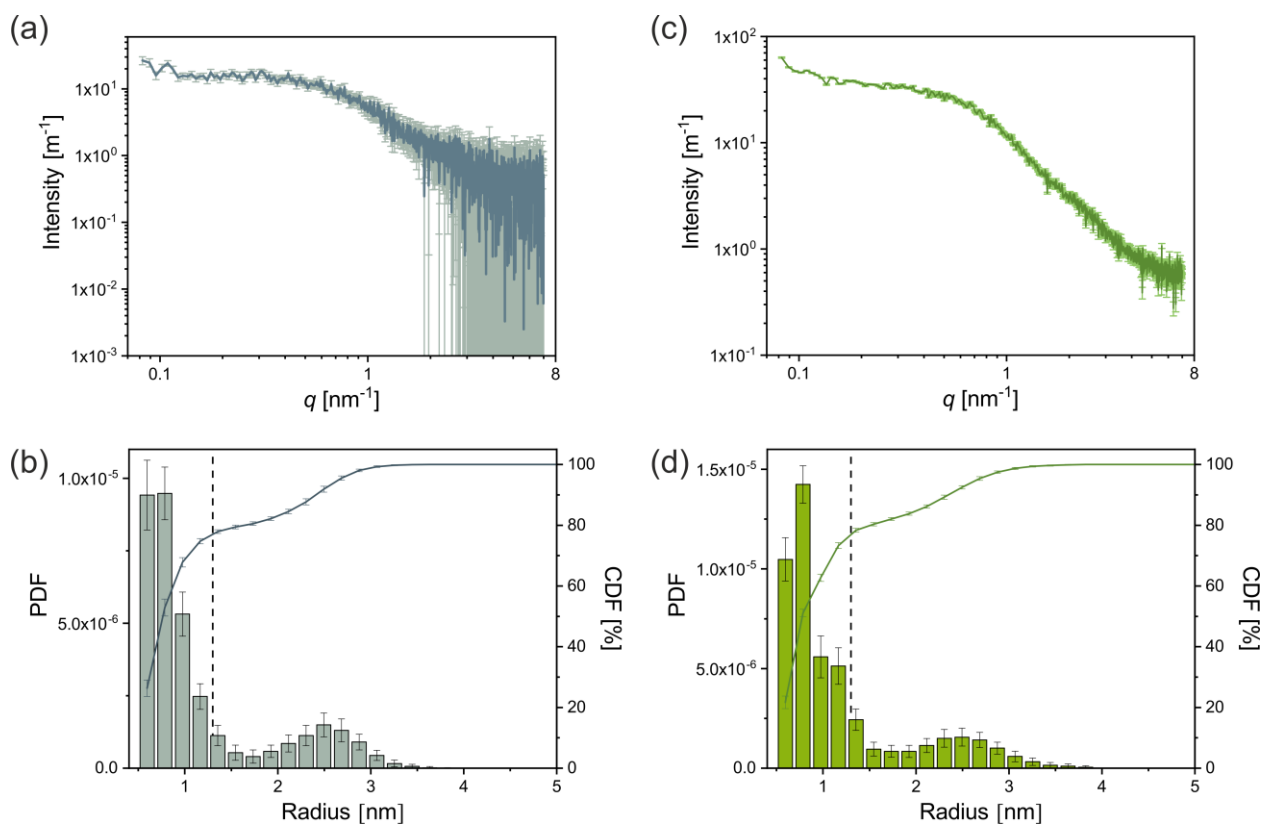

**Figure S2.** Comparison of the uncertainties of scattering curves and the corresponding volume-weighted size distributions in dependence of the number of averaged 10 s individual measurements when averaging over (a, b) 120 or (c, d) 8640 measurement cycles. The PDFs are given as volume fraction, the CDFs as volume fraction in percentage. Vertical dashed lines at 1.3 nm show the boundary between the two nanoparticle populations  $\mathbf{p}_{\text{small}}$  and  $\mathbf{p}_{\text{large}}$ .
